# Supplementary material for: Automatic versus manual oxygen titration using a novel nasal high-flow device in medical inpatients with an acute illness: a randomised controlled trial
Source: HighWire-hosted journal article supplement (doi:10.1136/bmjresp-2020-000843), 2021-08-01
Supplement: bmjresp-2020-000843supp001_data_supplement.pdf [file bmjresp-2020-000843supp001_data_supplement.pdf]

**AUTOMATIC VERSUS MANUAL OXYGEN TITRATION USING A NOVEL NASAL  
HIGH-FLOW DEVICE IN MEDICAL INPATIENTS WITH AN ACUTE ILLNESS: A  
RANDOMISED CONTROLLED TRIAL**

**SUPPLEMENTARY MATERIAL**

<sup>1,2,4</sup>James CP Harper, <sup>1,4</sup>Nethmi A Kearns, <sup>1,2,4</sup>Grace E Bird,  
<sup>1</sup>Irene Braithwaite, <sup>1</sup>Nicholas P Shortt, <sup>1</sup>Allie Eathorne, <sup>3</sup>Mark Weatherall,  
<sup>1,2,4</sup>Richard Beasley

<sup>1</sup>Medical Research Institute of New Zealand, Wellington, New Zealand

<sup>2</sup>Victoria University, Wellington, New Zealand

<sup>3</sup>University of Otago Wellington, Wellington, New Zealand

<sup>4</sup>Capital & Coast District Health Board, Wellington, New Zealand

**Correspondence to:**

Dr James Harper  
Medical Research Institute of New Zealand  
Private Bag 7902, Newtown  
Wellington 6242, New Zealand  
Email: James.Harper@mrinz.ac.nz

## METHODS

### Withdrawal criteria

- Sustained (> 10 minutes) requirement for >50% FiO<sub>2</sub> (92-96% group) or >40% FiO<sub>2</sub> (88-92% group) at rest
- Sustained (> 10 minutes) requirement for FiO<sub>2</sub> in excess of the maximum allowed limit to maintain target SpO<sub>2</sub>. The maximum allowed limit is defined as the FiO<sub>2</sub> at the start of the randomized treatment plus 10
- An increase in FiO<sub>2</sub> of 10 is insufficient to maintain target SpO<sub>2</sub>. This may be lower than the maximum allowed FiO<sub>2</sub> if the oxygen concentration has been decreased since the start of the randomised treatment.
- Requirement for a target SpO<sub>2</sub> range other than 88-92% or 92-96% as determined by the participant's medical team after enrollment
- Requirement for NIV, CPAP or endotracheal intubation
- Admission to ICU
- Ineligibility (either arising during the trial or retrospectively having been overlooked at screening)
- Significant protocol deviation
- Significant non-compliance with trial requirements
- An adverse event which requires discontinuation of the trial
- Any concern over participant safety

**RESULTS****Table S1: Difference in blood gas parameters between interventions**

|                               | <b>Mean difference (automatic minus manual)<br/>adjusted for baseline (95% CI)</b> | <b>P value</b> |
|-------------------------------|------------------------------------------------------------------------------------|----------------|
| <b>pH</b>                     | -0.001 (-0.02 to 0.02)                                                             | 0.94           |
| <b>PCO<sub>2</sub> (mmHg)</b> | 0.50 (-2.0 to 3.0)                                                                 | 0.68           |
| <b>PO<sub>2</sub> (mmHg)</b>  | -3.1 (-14.7 to 8.6)                                                                | 0.59           |
